# Supplementary material
Source: HighWire-hosted journal article supplement (https://bmjopen.bmj.com/content/8/9/e020974)
Supplement: inline-supplementary-material-1 [file inline-supplementary-material-1.pdf]

## **Supplementary appendix**

Table S1. Korea Drug Codes for oral fluoroquinolones and cefixime

Table S2. Korea Drug Codes for medications used in the exclusion criteria that are associated with prolonged QT intervals or an increased risk of developing torsades de pointes

Table S3. ICD-10 covariate codes

Table S4. Baseline characteristics of patients using cefixime or ciprofloxacin and the standardized differences before and after IPTW

Table S5. Baseline characteristics of patients using cefixime or levofloxacin and the standardized differences before and after IPTW

Table S6. Baseline characteristics of patients using cefixime or ofloxacin and the standardized differences before and after IPTW

Table S7. Baseline characteristics of patients using cefixime or moxifloxacin and the standardized differences before and after IPTW

Table S1. Korea Drug Codes for oral fluoroquinolones and cefixime

| Medications   | Korea Drug Codes                                                |
|---------------|-----------------------------------------------------------------|
| Ciprofloxacin | 134101ATB,134103ATB, 134105ATB, 134105ATR, 134108ATR, 134109ATB |
| Levofloxacin  | 183201ATB, 183202ATB, 183203ATB                                 |
| Ofloxacin     | 203901ATB, 203904ATB                                            |
| Moxifloxacin  | 380301ATB                                                       |
| Cefixime      | 126301ACH                                                       |

Table S2. Korea Drug Codes for medications used in the exclusion criteria that are associated with prolonged QT intervals or an increased risk of developing torsades de pointes

| Medications    | Korea Drug Codes                                                                                      |
|----------------|-------------------------------------------------------------------------------------------------------|
| Amiodarone     | 107401ATB                                                                                             |
| Sotalol        | 230401ATB, 230402ATB                                                                                  |
| Quinidine      | 222001ATB, 222002ATB                                                                                  |
| Digoxin        | 144801ATB                                                                                             |
| Flecainide     | 159302ATB                                                                                             |
| Propafenone    | 219501ATB, 219502ATB                                                                                  |
| Erythromycin   | 153501ACH, 153801ATB, 154001ACH                                                                       |
| Clarithromycin | 134901ATB, 134904ATB                                                                                  |
| Telithromycin  | 455901ATB                                                                                             |
| Chloroquine    | 171602ATB, 171701ATB, 171702ATB, 171703ATB, 171704ATB,                                                |
| Ketoconazole   | 179601ATB,                                                                                            |
| Itraconazole   | 179101ACH, 179104ATB                                                                                  |
| Voriconazole   | 456501ATB                                                                                             |
| Sunitinib      | 487701ACH, 487702ACH, 487703ACH                                                                       |
| Domperidone    | 148402ATB, 148501ATB                                                                                  |
| Dolasetron     | 414602ATB                                                                                             |
| Ondansetron    | 204601ATB, 204601ATD, 204603ATB                                                                       |
| Granisetron    | 167301ATB, 167301ATD                                                                                  |
| Sumatriptan    | 233802ATB, 233803ATB                                                                                  |
| Zolmitriptan   | 415601ATB                                                                                             |
| Naratriptan    | 415501ATB                                                                                             |
| Chlorpromazine | 131901ATB, 131905ATB, 131908ATB                                                                       |
| Haloperidol    | 167903ATB, 167904ATB, 167905ATB, 167906ATB, 167908ATB,                                                |
| Pimozide       | 212401ATB, 212402ATB                                                                                  |
| Clozapine      | 137501ATB, 137502ATB                                                                                  |
| Quetiapine     | 378601ATB, 378602ATB, 378603ATB, 378604ATB,<br>378605ATR, 378606ATR, 378607ATR, 378608ATR, 378609ATR, |
| Risperidone    | 224201ATB, 224201ATD, 224202ATB, 224203ATB,<br>224204ATB, 224207ATB,                                  |
| Imipramine     | 173701ATB,                                                                                            |
| Paroxetine     | 209301ATB, 209302ATB, 209304ATR, 209305ATR, 209306ATR,                                                |
| Sertraline     | 227001ATB, 227002ATB                                                                                  |
| Venlafaxine    | 247502ATR, 247504ATR                                                                                  |
| Fluoxetine     | 161501ACH, 161502ACH, 161502ATD, 161504ACR                                                            |
| Fluvoxamine    | 162501ATB, 162502ATB                                                                                  |

Table S3. ICD-10 covariate codes

| <i>Comorbidities</i>                          |                                                     |
|-----------------------------------------------|-----------------------------------------------------|
| Hypertension                                  | I10-I13.x, I15.x                                    |
| Diabetes mellitus                             | E10.x-E14.x                                         |
| Acute myocardial infarction                   | I21.x, I22.x, I23.x                                 |
| Ischaemic heart disease                       | I20.x, I24.x, I25.x                                 |
| Cardiomyopathy                                | I42.x, I43.x                                        |
| Valve disorder                                | I34.x-37.x                                          |
| Arrhythmia                                    | I44.x, I45.x, I47.0, I47.1, I47.9, I49.1-9          |
| Congestive heart failure                      | I11.0, I13.0, I13.2, I50.x, J81.x                   |
| Congenital heart disease                      | Q20.x-26.x                                          |
| Cancer                                        | C00.x–C99.x                                         |
| Cerebrovascular disease                       | G45.x, G46.x, I60.x–I69.x                           |
| Renal disease                                 | N00.x-N08.x, N17.x-19.x, N25.x, Z49.x, Z94.0, Z99.2 |
| Arterial disease                              | I70.x-I79.x                                         |
| Venous thromboembolism                        | I26.x, I80.x                                        |
| Dementia                                      | F00.x–F03.x, G30.x                                  |
| Rheumatic disease (connective tissue disease) | M05.x, M06.x, M32.x–M34.x                           |
| Peptic ulcer disease                          | K25.x–K28.x                                         |
| Chronic lung disease                          | J40.x-47.x, J60.x-70.x                              |
| <i>Indications for antibiotics</i>            |                                                     |
| Upper respiratory infection                   | J01.x-J06.x                                         |
| Pneumonia                                     | J13.x-J18.x                                         |
| Other respiratory infection                   | J20.x-J22.x                                         |
| Gastrointestinal infection                    | A00.x-A09.x                                         |
| Urinary tract infection                       | N10.x-N12.x, N30.x, N39.0, N41.x                    |
| Genitourinary infection                       | N34.x, N45.x, N70.x-77.x                            |
| Skin/wound infection                          | L00.x-L08.x                                         |

ICD-10=International Classification of Diseases, Tenth Revision

Table S4. Baseline characteristics of patients using cefixime or ciprofloxacin and the standardized difference before and after IPTW

|                                          | Cefixime        | Ciprofloxacin   | Standardized difference |            |
|------------------------------------------|-----------------|-----------------|-------------------------|------------|
|                                          |                 |                 | Before IPTW             | After IPTW |
| No. of subjects                          | 402930          | 1466133         |                         |            |
| Age, mean $\pm$ SD                       | 49.3 $\pm$ 17.7 | 48.5 $\pm$ 17.3 | 0.041                   | 0.046      |
| No. of females (%)                       | 238329 (59.1)   | 951813 (64.9)   | 0.119                   | 0.042      |
| <i>No. of Comorbidities (%)</i>          |                 |                 |                         |            |
| Hypertension                             | 121529 (30.2)   | 410360 (28.0)   | 0.048                   | 0.044      |
| Diabetes mellitus                        | 97779 (24.3)    | 321483 (21.9)   | 0.056                   | 0.042      |
| Acute myocardial infarction              | 6536 (1.6)      | 17451 (1.2)     | 0.037                   | 0.008      |
| Ischaemic heart disease                  | 45810 (11.4)    | 137303 (9.4)    | 0.066                   | 0.019      |
| Cardiomyopathy                           | 1450 (0.4)      | 3668 (0.3)      | 0.020                   | 0.003      |
| Valve disorder                           | 1826 (0.5)      | 4971 (0.3)      | 0.018                   | 0.005      |
| Arrhythmia                               | 14387 (3.6)     | 45727 (3.1)     | 0.025                   | 0.008      |
| Congestive heart failure                 | 21753 (5.4)     | 59507 (4.1)     | 0.063                   | 0.019      |
| Congenital heart disease                 | 550 (0.1)       | 1599 (0.1)      | 0.008                   | 0.002      |
| Cancer                                   | 43336 (10.8)    | 128612 (8.8)    | 0.067                   | 0.015      |
| Cerebrovascular disease                  | 42741 (10.6)    | 127394 (8.7)    | 0.065                   | 0.030      |
| Renal disease                            | 27440 (6.8)     | 93946 (6.4)     | 0.016                   | 0.027      |
| Arterial disease                         | 58202 (14.4)    | 201275 (13.7)   | 0.021                   | 0.021      |
| Venous thromboembolism                   | 5613 (1.4)      | 15375 (1.0)     | 0.031                   | 0.005      |
| Dementia                                 | 17245 (4.3)     | 48445 (3.3)     | 0.051                   | 0.037      |
| Rheumatic disease                        | 29610 (7.3)     | 97980 (6.7)     | 0.026                   | 0.009      |
| Peptic ulcer disease                     | 148247 (36.8)   | 527527(36.0)    | 0.017                   | 0.038      |
| Chronic lung disease                     | 215194 (53.4)   | 633215 (43.2)   | 0.206                   | 0.026      |
| <i>No. of Antibiotic Indications (%)</i> |                 |                 |                         |            |
| Upper respiratory infection              | 41000 (10.2)    | 34919 (2.4)     | 0.326                   | 0.002      |
| Pneumonia                                | 17362 (4.3)     | 13792 (0.9)     | 0.212                   | 0.002      |
| Other respiratory infection              | 31943 (7.9)     | 49097 (3.3)     | 0.200                   | 0.003      |
| Gastrointestinal infection               | 10997 (2.7)     | 258359 (17.6)   | 0.508                   | 0.001      |
| Urinary tract infection                  | 24497 (6.1)     | 477439 (32.6)   | 0.712                   | 0.014      |
| Genitourinary infection                  | 10357 (2.6)     | 103874 (7.1)    | 0.212                   | 0.003      |
| Skin/Wound infection                     | 15212 (3.8)     | 13240 (0.9)     | 0.191                   | 0.002      |
| <i>Month, No (%)</i>                     |                 |                 |                         |            |
| 1                                        | 51082 (12.7)    | 198022 (13.5)   | 0.122                   | 0.028      |
| 2                                        | 41252 (10.2)    | 139390 (9.5)    |                         |            |
| 3                                        | 43687 (10.8)    | 136164 (9.3)    |                         |            |
| 4                                        | 39505 (9.8)     | 123691 (8.4)    |                         |            |
| 5                                        | 32150 (8.0)     | 107959 (7.4)    |                         |            |
| 6                                        | 28567 (7.1)     | 110219 (7.5)    |                         |            |
| 7                                        | 25587 (6.4)     | 121446 (8.3)    |                         |            |
| 8                                        | 26722 (6.6)     | 118711 (8.1)    |                         |            |
| 9                                        | 27912 (6.9)     | 104986 (7.2)    |                         |            |
| 10                                       | 29177 (7.2)     | 97368 (6.6)     |                         |            |
| 11                                       | 26293 (6.5)     | 97704 (6.7)     |                         |            |
| 12                                       | 30966 (7.7)     | 110473 (7.5)    |                         |            |

Table S5. Baseline characteristics of patients using cefixime or levofloxacin and the standardized difference before and after IPTW

|                                          | Cefixime        | Levofloxacin    | Standardized difference |            |
|------------------------------------------|-----------------|-----------------|-------------------------|------------|
|                                          |                 |                 | Before IPTW             | After IPTW |
| No. of subjects                          | 402930          | 1141961         |                         |            |
| Age, mean $\pm$ SD                       | 49.3 $\pm$ 17.7 | 50.4 $\pm$ 16.7 | 0.068                   | 0.042      |
| No. of females (%)                       | 238329 (59.1)   | 643076 (56.3)   | 0.057                   | 0.064      |
| <i>No. of Comorbidities (%)</i>          |                 |                 |                         |            |
| Hypertension                             | 121529 (30.2)   | 346918 (30.4)   | 0.005                   | 0.026      |
| Diabetes mellitus                        | 97779 (24.3)    | 268447 (23.5)   | 0.018                   | 0.024      |
| Acute myocardial infarction              | 6536 (1.6)      | 15209 (1.3)     | 0.024                   | 0.005      |
| Ischaemic heart disease                  | 45810 (11.4)    | 122740 (10.7)   | 0.020                   | 0.014      |
| Cardiomyopathy                           | 1450 (0.4)      | 3443 (0.3)      | 0.010                   | 0.001      |
| Valve disorder                           | 1826 (0.5)      | 4643 (0.4)      | 0.007                   | 0.003      |
| Arrhythmia                               | 14387 (3.6)     | 38751 (3.4)     | 0.010                   | 0.007      |
| Congestive heart failure                 | 21753 (5.4)     | 55276 (4.8)     | 0.025                   | 0.013      |
| Congenital heart disease                 | 550 (0.1)       | 1430 (0.1)      | 0.003                   | <0.001     |
| Cancer                                   | 43336 (10.8)    | 118618 (10.4)   | 0.012                   | 0.011      |
| Cerebrovascular disease                  | 42741 (10.6)    | 113241 (9.9)    | 0.023                   | 0.021      |
| Renal disease                            | 27440 (6.8)     | 73935 (6.5)     | 0.013                   | 0.016      |
| Arterial disease                         | 58202 (14.4)    | 173004 (15.1)   | 0.020                   | 0.015      |
| Venous thromboembolism                   | 5613 (1.4)      | 14016 (1.2)     | 0.015                   | 0.004      |
| Dementia                                 | 17245 (4.3)     | 41097 (3.6)     | 0.035                   | 0.022      |
| Rheumatic disease                        | 29610 (7.3)     | 77971 (6.8)     | 0.020                   | 0.006      |
| Peptic ulcer disease                     | 148247 (36.8)   | 418871 (36.7)   | 0.002                   | 0.027      |
| Chronic lung disease                     | 215194 (53.4)   | 586894 (51.4)   | 0.040                   | 0.019      |
| <i>No. of Antibiotic Indications (%)</i> |                 |                 |                         |            |
| Upper respiratory infection              | 41000 (10.2)    | 71542 (6.3)     | 0.143                   | 0.002      |
| Pneumonia                                | 17362 (4.3)     | 54016 (4.7)     | 0.020                   | 0.007      |
| Other respiratory infection              | 31943 (7.9)     | 118629 (10.4)   | 0.085                   | 0.001      |
| Gastrointestinal infection               | 10997 (2.7)     | 26806 (2.3)     | 0.024                   | <0.001     |
| Urinary tract infection                  | 24497 (6.1)     | 255878 (22.4)   | 0.480                   | 0.003      |
| Genitourinary infection                  | 10357 (2.6)     | 104759 (9.2)    | 0.284                   | 0.012      |
| Skin/Wound infection                     | 15212 (3.8)     | 20509 (1.8)     | 0.121                   | 0.001      |
| <i>Month, No (%)</i>                     |                 |                 |                         |            |
| 1                                        | 51082 (12.7)    | 186297 (16.3)   | 0.161                   | 0.020      |
| 2                                        | 41252 (10.2)    | 128738 (11.3)   |                         |            |
| 3                                        | 43687 (10.8)    | 128601 (11.3)   |                         |            |
| 4                                        | 39505 (9.8)     | 113718 (10.0)   |                         |            |
| 5                                        | 32150 (8.0)     | 89592 (7.8)     |                         |            |
| 6                                        | 28567 (7.1)     | 83536 (7.3)     |                         |            |
| 7                                        | 25587 (6.4)     | 76140 (6.7)     |                         |            |
| 8                                        | 26722 (6.6)     | 74130 (6.5)     |                         |            |
| 9                                        | 27912 (6.9)     | 72417 (6.3)     |                         |            |
| 10                                       | 29177 (7.2)     | 72734 (6.4)     |                         |            |
| 11                                       | 26293 (6.5)     | 55296 (4.8)     |                         |            |
| 12                                       | 30966 (7.7)     | 60762 (5.3)     |                         |            |

Table S6. Baseline characteristics of patients using cefixime or ofloxacin and the standardized difference before and after IPTW

|                                          |                 |                 | Standardized difference |            |
|------------------------------------------|-----------------|-----------------|-------------------------|------------|
|                                          | Cefixime        | Ofloxacin       | Before IPTW             | After IPTW |
| No. of subjects                          | 402930          | 1830786         |                         |            |
| Age, mean $\pm$ SD                       | 49.3 $\pm$ 17.7 | 50.3 $\pm$ 16.9 | 0.061                   | 0.009      |
| No. of females (%)                       | 238329 (59.1)   | 1120119 (61.2)  | 0.042                   | 0.006      |
| <i>No. of Comorbidities (%)</i>          |                 |                 |                         |            |
| Hypertension                             | 121529 (30.2)   | 540934 (29.5)   | 0.013                   | 0.005      |
| Diabetes mellitus                        | 97779 (24.3)    | 382877 (20.9)   | 0.080                   | 0.001      |
| Acute myocardial infarction              | 6536 (1.6)      | 11731 (1.0)     | 0.058                   | 0.001      |
| Ischaemic heart disease                  | 45810 (11.4)    | 161602 (8.8)    | 0.084                   | 0.004      |
| Cardiomyopathy                           | 1450 (0.4)      | 3924 (0.2)      | 0.027                   | <0.001     |
| Valve disorder                           | 1826 (0.5)      | 6219 (0.3)      | 0.018                   | 0.001      |
| Arrhythmia                               | 14387 (3.6)     | 53536 (2.9)     | 0.036                   | 0.001      |
| Congestive heart failure                 | 21753 (5.4)     | 68471 (3.7)     | 0.079                   | 0.003      |
| Congenital heart disease                 | 550 (0.1)       | 1894 (0.1)      | 0.010                   | <0.001     |
| Cancer                                   | 43336 (10.8)    | 122116 (6.7)    | 0.145                   | 0.008      |
| Cerebrovascular disease                  | 42741 (10.6)    | 155453 (8.5)    | 0.072                   | 0.001      |
| Renal disease                            | 27440 (6.8)     | 83202 (4.5)     | 0.098                   | 0.005      |
| Arterial disease                         | 58202 (14.4)    | 268362 (14.7)   | 0.006                   | 0.003      |
| Venous thromboembolism                   | 5613 (1.4)      | 16571 (0.9)     | 0.046                   | 0.004      |
| Dementia                                 | 17245 (4.3)     | 46626 (2.5)     | 0.096                   | 0.005      |
| Rheumatic disease                        | 29610 (7.3)     | 112629 (6.2)    | 0.048                   | 0.001      |
| Peptic ulcer disease                     | 148247 (36.8)   | 636452 (34.8)   | 0.042                   | 0.004      |
| Chronic lung disease                     | 215194 (53.4)   | 810357 (44.3)   | 0.184                   | 0.004      |
| <i>No. of Antibiotic Indications (%)</i> |                 |                 |                         |            |
| Upper respiratory infection              | 41000 (10.2)    | 200376 (10.9)   | 0.025                   | 0.006      |
| Pneumonia                                | 17362 (4.3)     | 10048 (0.5)     | 0.246                   | 0.001      |
| Other respiratory infection              | 31943 (7.9)     | 266793 (14.6)   | 0.211                   | 0.005      |
| Gastrointestinal infection               | 10997 (2.7)     | 116001 (6.3)    | 0.174                   | 0.002      |
| Urinary tract infection                  | 24497 (6.1)     | 204458 (11.2)   | 0.182                   | 0.006      |
| Genitourinary infection                  | 10357 (2.6)     | 75822 (4.1)     | 0.087                   | 0.004      |
| Skin/Wound infection                     | 15212 (3.8)     | 47573 (2.6)     | 0.067                   | 0.004      |
| <i>Month, No (%)</i>                     |                 |                 |                         |            |
| 1                                        | 51082 (12.7)    | 255833 (14.0)   | 0.058                   | 0.009      |
| 2                                        | 41252 (10.2)    | 200347 (10.9)   |                         |            |
| 3                                        | 43687 (10.8)    | 207332 (11.3)   |                         |            |
| 4                                        | 39505 (9.8)     | 177080 (9.7)    |                         |            |
| 5                                        | 32150 (8.0)     | 141413 (7.7)    |                         |            |
| 6                                        | 28567 (7.1)     | 127462 (7.0)    |                         |            |
| 7                                        | 25587 (6.4)     | 117053 (6.4)    |                         |            |
| 8                                        | 26722 (6.6)     | 115864 (6.3)    |                         |            |
| 9                                        | 27912 (6.9)     | 117031 (6.4)    |                         |            |
| 10                                       | 29177 (7.2)     | 124597 (6.8)    |                         |            |
| 11                                       | 26293 (6.5)     | 116492 (6.4)    |                         |            |
| 12                                       | 30966 (7.7)     | 130282 (7.1)    |                         |            |

Table S7. Baseline characteristics of patients using cefixime or moxifloxacin and the standardized difference before and after IPTW

|                                          | Cefixime        | Moxifloxacin    | Standardized difference |            |
|------------------------------------------|-----------------|-----------------|-------------------------|------------|
|                                          |                 |                 | Before IPTW             | After IPTW |
| No. of subjects                          | 402930          | 47080           |                         |            |
| Age, mean $\pm$ SD                       | 49.3 $\pm$ 17.7 | 58.4 $\pm$ 17.4 | 0.521                   | 0.007      |
| No. of females (%)                       | 238329 (59.1)   | 23586 (50.1)    | 0.183                   | 0.024      |
| <i>No. of Comorbidities (%)</i>          |                 |                 |                         |            |
| Hypertension                             | 121529 (30.2)   | 21690 (46.1)    | 0.332                   | 0.031      |
| Diabetes mellitus                        | 97779 (24.3)    | 17977 (38.2)    | 0.304                   | 0.027      |
| Acute myocardial infarction              | 6536 (1.6)      | 1292 (2.7)      | 0.077                   | 0.011      |
| Ischaemic heart disease                  | 45810 (11.4)    | 9408 (20)       | 0.239                   | 0.024      |
| Cardiomyopathy                           | 1450 (0.4)      | 438 (0.9)       | 0.071                   | 0.005      |
| Valve disorder                           | 1826 (0.5)      | 513 (1.1)       | 0.073                   | 0.002      |
| Arrhythmia                               | 14387 (3.6)     | 2761 (5.9)      | 0.108                   | 0.012      |
| Congestive heart failure                 | 21753 (5.4)     | 5724 (12.2)     | 0.241                   | 0.013      |
| Congenital heart disease                 | 550 (0.1)       | 110 (0.2)       | 0.023                   | 0.004      |
| Cancer                                   | 43336 (10.8)    | 10285 (21.8)    | 0.304                   | 0.010      |
| Cerebrovascular disease                  | 42741 (10.6)    | 8389 (17.8)     | 0.208                   | 0.018      |
| Renal disease                            | 27440 (6.8)     | 5657 (12)       | 0.179                   | 0.025      |
| Arterial disease                         | 58202 (14.4)    | 9298 (19.7)     | 0.141                   | 0.019      |
| Venous thromboembolism                   | 5613 (1.4)      | 1704 (3.6)      | 0.143                   | 0.002      |
| Dementia                                 | 17245 (4.3)     | 4046 (8.6)      | 0.176                   | 0.023      |
| Rheumatic disease                        | 29610 (7.3)     | 4453 (9.5)      | 0.076                   | 0.012      |
| Peptic ulcer disease                     | 148247 (36.8)   | 21304 (45.3)    | 0.173                   | 0.024      |
| Chronic lung disease                     | 215194 (53.4)   | 36096 (76.7)    | 0.503                   | 0.003      |
| <i>No. of Antibiotic Indications (%)</i> |                 |                 |                         |            |
| Upper respiratory infection              | 41000 (10.2)    | 2024 (4.3)      | 0.228                   | 0.019      |
| Pneumonia                                | 17362 (4.3)     | 10567 (22.4)    | 0.553                   | 0.018      |
| Other respiratory infection              | 31943 (7.9)     | 2898 (6.2)      | 0.069                   | 0.017      |
| Gastrointestinal infection               | 10997 (2.7)     | 142 (0.3)       | 0.200                   | <0.001     |
| Urinary tract infection                  | 24497 (6.1)     | 396 (0.8)       | 0.290                   | 0.015      |
| Genitourinary infection                  | 10357 (2.6)     | 806 (1.7)       | 0.059                   | 0.060      |
| Skin/Wound infection                     | 15212 (3.8)     | 589 (1.3)       | 0.162                   | 0.040      |
| <i>Month, No (%)</i>                     |                 |                 |                         |            |
| 1                                        | 51082 (12.7)    | 8179 (17.4)     | 0.201                   | 0.046      |
| 2                                        | 41252 (10.2)    | 5913 (12.6)     |                         |            |
| 3                                        | 43687 (10.8)    | 5674 (12.1)     |                         |            |
| 4                                        | 39505 (9.8)     | 4736 (10.1)     |                         |            |
| 5                                        | 32150 (8.0)     | 3549 (7.5)      |                         |            |
| 6                                        | 28567 (7.1)     | 3132 (6.7)      |                         |            |
| 7                                        | 25587 (6.4)     | 2486 (5.3)      |                         |            |
| 8                                        | 26722 (6.6)     | 2323 (4.9)      |                         |            |
| 9                                        | 27912 (6.9)     | 2383 (5.1)      |                         |            |
| 10                                       | 29177 (7.2)     | 2791 (5.9)      |                         |            |
| 11                                       | 26293 (6.5)     | 2412 (5.1)      |                         |            |
| 12                                       | 30966 (7.7)     | 3502 (7.4)      |                         |            |
